# Supplementary material for: Sex differences in risks of in-hospital and late outcomes after cardiac surgery: a nationwide population-based cohort study
Source: PubMed Central journal article supplement — BMJ Open. 2022 Feb 2;12(2):e058538. doi: 10.1136/bmjopen-2021-058538 (PMC8811586; doi:10.1136/bmjopen-2021-058538), 2022-02-02
Supplement: bmjopen-2021-058538supp001.pdf [file bmjopen-2021-058538supp001.pdf]

**Table S1.** ICD-9-CM diagnostic codes for diseases.

| Variable                              | Code                                                                                    |
|---------------------------------------|-----------------------------------------------------------------------------------------|
| Diabetes mellitus                     | 250.xx                                                                                  |
| Hypertension                          | 401.xx-405.xx                                                                           |
| Heart failure                         | 428.xx                                                                                  |
| Coronary artery disease               | 410.xx-414.xx                                                                           |
| Myocardial infarction                 | 410.xx, 412.xx                                                                          |
| Peripheral arterial disease           | 440.0x, 440.2x, 440.3x, 440.8x, 440.9x,<br>443x, 444.0x, 444.22, 444.8x, 447.8x, 447.9x |
| Stroke                                | 430.xx-437.xx                                                                           |
| Chronic obstructive pulmonary disease | 491.xx, 492.xx, 496.xx                                                                  |
| Liver cirrhosis                       | 571.2, 571.5, 571.6                                                                     |
| Malignancy                            | 140.xx-208.xx (Catastrophic illness card)                                               |
| Dialysis                              | 585.xx (Catastrophic illness card)                                                      |

Abbreviations: ICD-9-CM, International Classification of Diseases, Ninth Revision, Clinical Modification.

**Table S2.** ICD-9-CM procedure codes and Taiwan NHI reimbursement codes for surgeries.

| Variable                           | Code                                                                                                   |
|------------------------------------|--------------------------------------------------------------------------------------------------------|
| Valve surgery                      | ICD: 3511, 3512, 3514, 3521, 3522, 3523, 3524, 3527, 3528<br>NHI: 68015.x-68018.x                      |
| CABG                               | ICD: 3611, 3612, 3613, 3614<br>NHI: 68023.x-68025.x                                                    |
| Previous cardiac surgery           | NHI: 68023.x, 68024.x, 68025.x, 68015.x, 68016.x, 68017.x, 68018.x, 69024.x, 69035.x, 69036.x, 69037.x |
| Type of CABG (On pump/ Off pump)   | NHI: 68036.x, 68052B, 47056.x                                                                          |
| Aortic valve repair or replacement | ICD: 3511, 3521, 3522                                                                                  |
| Mitral valve repair                | ICD: 3512                                                                                              |
| Mitral valve replacement           | ICD: 3523, 3524                                                                                        |
| Tricuspid repair                   | ICD: 3514                                                                                              |
| Tricuspid replacement              | ICD: 3527, 3528                                                                                        |
| Concomitant maze                   | ICD: 3733                                                                                              |

Abbreviations: ICD-9-CM, International Classification of Diseases, Ninth Revision, Clinical Modification; NHI, National Health Insurance; CABG, coronary artery bypass graft.

**Table S3.** Detailed demographics, clinical and surgical characteristics, and outcomes of the female and male patients who underwent major cardiac surgeries.

| Variable                    | Before matching                |                              |       | After matching                 |                              |       |
|-----------------------------|--------------------------------|------------------------------|-------|--------------------------------|------------------------------|-------|
|                             | Female<br>( <i>n</i> = 20,078) | Male<br>( <i>n</i> = 46,248) | STD   | Female<br>( <i>n</i> = 18,720) | Male<br>( <i>n</i> = 18,720) | STD   |
| Age (years)                 | 64.4 ± 12.8                    | 63.2 ± 12.3                  | 0.09  | 64.4 ± 12.8                    | 64.1 ± 12.8                  | 0.02  |
| Monthly income, US dollar   |                                |                              |       |                                |                              |       |
| 0–596                       | 7,620 (38.0)                   | 18,719 (40.5)                | -0.05 | 7,218 (38.6)                   | 7,233 (38.6)                 | <0.01 |
| 610–760                     | 7,339 (36.6)                   | 13,140 (28.4)                | 0.17  | 6,671 (35.6)                   | 6,592 (35.2)                 | 0.01  |
| > 800                       | 5,119 (25.5)                   | 14,389 (31.1)                | -0.12 | 4,831 (25.8)                   | 4,895 (26.1)                 | -0.01 |
| Urbanization level          |                                |                              |       |                                |                              |       |
| Low                         | 3,148 (15.7)                   | 5,993 (13.0)                 | 0.08  | 2,865 (15.3)                   | 2,832 (15.1)                 | <0.01 |
| Moderate                    | 5,652 (28.2)                   | 12,653 (27.4)                | 0.02  | 5,333 (28.5)                   | 5,243 (28.0)                 | 0.01  |
| High                        | 6,156 (30.7)                   | 14,620 (31.6)                | -0.02 | 5,772 (30.8)                   | 5,921 (31.6)                 | -0.02 |
| Very High                   | 5,122 (25.5)                   | 12,982 (28.1)                | -0.06 | 4,750 (25.4)                   | 4,724 (25.2)                 | <0.01 |
| Previous cardiac surgery    | 290 (1.4)                      | 515 (1.1)                    | 0.03  | 251 (1.3)                      | 271 (1.4)                    | -0.01 |
| Urgent surgery              | 2,046 (10.2)                   | 5,701 (12.3)                 | -0.07 | 1,994 (10.7)                   | 1,995 (10.7)                 | <0.01 |
| Comorbid conditions         |                                |                              |       |                                |                              |       |
| Diabetes mellitus           | 8,761 (43.6)                   | 17,887 (38.7)                | 0.10  | 8,389 (44.8)                   | 8,351 (44.6)                 | <0.01 |
| Hypertension                | 12,102 (60.3)                  | 28,883 (62.5)                | -0.04 | 11,619 (62.1)                  | 11,501 (61.4)                | 0.01  |
| Heart failure               | 6,071 (30.2)                   | 10,226 (22.1)                | 0.19  | 5,390 (28.8)                   | 5,455 (29.1)                 | -0.01 |
| Coronary arterial disease   | 13,632 (67.9)                  | 38,438 (83.1)                | -0.36 | 13,200 (70.5)                  | 13,128 (70.1)                | 0.01  |
| Prior myocardial infarction | 2,732 (13.6)                   | 9,447 (20.4)                 | -0.18 | 2,699 (14.4)                   | 2,656 (14.2)                 | 0.01  |
| Peripheral arterial disease | 981 (4.9)                      | 2,204 (4.8)                  | 0.01  | 919 (4.9)                      | 932 (5.0)                    | <0.01 |
| Prior stroke                | 2,894 (14.4)                   | 6,227 (13.5)                 | 0.03  | 2,693 (14.4)                   | 2,714 (14.5)                 | <0.01 |

| Variable                                                         | Before matching                |                              |       | After matching                 |                              |       |
|------------------------------------------------------------------|--------------------------------|------------------------------|-------|--------------------------------|------------------------------|-------|
|                                                                  | Female<br>( <i>n</i> = 20,078) | Male<br>( <i>n</i> = 46,248) | STD   | Female<br>( <i>n</i> = 18,720) | Male<br>( <i>n</i> = 18,720) | STD   |
| Chronic obstructive pulmonary disease                            | 1,096 (5.5)                    | 4,614 (10.0)                 | -0.17 | 1,068 (5.7)                    | 1,102 (5.9)                  | -0.01 |
| Liver cirrhosis                                                  | 297 (1.5)                      | 910 (2.0)                    | -0.04 | 274 (1.5)                      | 307 (1.6)                    | -0.01 |
| Malignancy                                                       | 796 (4.0)                      | 1,571 (3.4)                  | 0.03  | 722 (3.9)                      | 683 (3.6)                    | 0.01  |
| Charlson's Comorbidity Index score                               | 2.6 ± 2.3                      | 2.3 ± 2.2                    | 0.09  | 2.6 ± 2.3                      | 2.6 ± 2.3                    | <0.01 |
| Hospital level                                                   |                                |                              |       |                                |                              |       |
| Medical center (teaching hospital)                               | 14,333 (71.4)                  | 33,482 (72.4)                | -0.02 | 13,405 (71.6)                  | 13,432 (71.8)                | <0.01 |
| Regional / district hospital                                     | 5,745 (28.6)                   | 12,766 (27.6)                | 0.02  | 5,315 (28.4)                   | 5,288 (28.2)                 | <0.01 |
| Cumulative volume of valve or CABG surgery between 2000 and 2013 |                                |                              |       |                                |                              |       |
| 1st quartile (1-1289)                                            | 5,053 (25.2)                   | 11,069 (23.9)                | 0.03  | 4,704 (25.1)                   | 4,680 (25.0)                 | <0.01 |
| 2nd quartile (1675-3462)                                         | 5,469 (27.2)                   | 12,840 (27.8)                | -0.01 | 5,110 (27.3)                   | 5,205 (27.8)                 | -0.01 |
| 3rd quartile (4453-5162)                                         | 4,222 (21.0)                   | 11,038 (23.9)                | -0.07 | 4,007 (21.4)                   | 4,028 (21.5)                 | <0.01 |
| 4th quartile (6158-8056)                                         | 5,334 (26.6)                   | 11,301 (24.4)                | 0.05  | 4,899 (26.2)                   | 4,807 (25.7)                 | 0.01  |
| Surgical type                                                    |                                |                              |       |                                |                              |       |
| Isolated CABG                                                    | 9,849 (49.1)                   | 32,303 (69.8)                | -0.43 | 9,818 (52.4)                   | 9,818 (52.4)                 | 0     |
| Isolated valve                                                   | 8,573 (42.7)                   | 10,487 (22.7)                | 0.44  | 7,374 (39.4)                   | 7,374 (39.4)                 | 0     |
| CABG + valve                                                     | 1,656 (8.2)                    | 3,458 (7.5)                  | 0.03  | 1,528 (8.2)                    | 1,528 (8.2)                  | 0     |
| CABG details ( <i>n</i> = 47,266)                                |                                |                              |       |                                |                              |       |
| Number of bypassed vessels                                       |                                |                              |       |                                |                              |       |
| 1                                                                | 999 (8.7)                      | 1,894 (5.3)                  | 0.13  | 952 (8.4)                      | 683 (6.0)                    | 0.09  |
| 2                                                                | 2,264 (19.7)                   | 6,077 (17.0)                 | 0.07  | 2,224 (19.6)                   | 1,987 (17.5)                 | 0.05  |
| 3                                                                | 6,692 (58.2)                   | 22,392 (62.6)                | -0.09 | 6,635 (58.5)                   | 6,945 (61.2)                 | -0.06 |

| Variable                                   | Before matching                |                              |       | After matching                 |                              |       |
|--------------------------------------------|--------------------------------|------------------------------|-------|--------------------------------|------------------------------|-------|
|                                            | Female<br>( <i>n</i> = 20,078) | Male<br>( <i>n</i> = 46,248) | STD   | Female<br>( <i>n</i> = 18,720) | Male<br>( <i>n</i> = 18,720) | STD   |
| 4 or more                                  | 1,550 (13.5)                   | 5,398 (15.1)                 | -0.05 | 1,535 (13.5)                   | 1,731 (15.3)                 | -0.05 |
| Number of bypassed vessels                 | 2.8 ± 0.8                      | 2.9 ± 0.7                    | -0.15 | 2.8 ± 0.8                      | 2.9 ± 0.7                    | -0.11 |
| Type of CABG                               |                                |                              |       |                                |                              |       |
| On pump                                    | 9,468 (82.3)                   | 29,181 (81.6)                | 0.02  | 9,333 (82.3)                   | 9,333 (82.3)                 | <0.01 |
| Off pump                                   | 2,037 (17.7)                   | 6,580 (18.4)                 | -0.02 | 2,013 (17.7)                   | 2,013 (17.7)                 | <0.01 |
| Valve surgery details ( <i>n</i> = 24,174) |                                |                              |       |                                |                              |       |
| Number of involved valves                  |                                |                              |       |                                |                              |       |
| 1                                          | 5,907 (57.7)                   | 9,132 (65.5)                 | -0.16 | 5,484 (61.6)                   | 5,484 (61.6)                 | <0.01 |
| 2                                          | 3,645 (35.6)                   | 4,066 (29.2)                 | 0.14  | 2,905 (32.6)                   | 2,905 (32.6)                 | <0.01 |
| 3                                          | 677 (6.6)                      | 747 (5.4)                    | 0.05  | 513 (5.8)                      | 513 (5.8)                    | <0.01 |
| Number of intervened valves                | 1.5 ± 0.6                      | 1.4 ± 0.6                    | 0.15  | 1.4 ± 0.6                      | 1.4 ± 0.6                    | <0.01 |
| Type of valve surgery                      |                                |                              |       |                                |                              |       |
| Aortic valve repair or replacement         | 4,085 (39.9)                   | 7,011 (50.3)                 | -0.21 | 3,897 (43.8)                   | 3,897 (43.8)                 | <0.01 |
| Mitral valve repair                        | 3,173 (31.0)                   | 3,881 (27.8)                 | 0.07  | 2,612 (29.3)                   | 2,612 (29.3)                 | <0.01 |
| Mitral valve replacement                   | 5,634 (55.1)                   | 5,857 (42.0)                 | 0.26  | 4,504 (50.6)                   | 4,504 (50.6)                 | <0.01 |
| Tricuspid repair                           | 1,295 (12.7)                   | 1,256 (9.0)                  | 0.12  | 953 (10.7)                     | 953 (10.7)                   | <0.01 |
| Tricuspid replacement                      | 330 (3.2)                      | 395 (2.8)                    | 0.02  | 232 (2.6)                      | 232 (2.6)                    | <0.01 |
| Concomitant maze                           | 1,349 (6.7)                    | 1,336 (2.9)                  | 0.18  | 969 (5.2)                      | 1,028 (5.5)                  | -0.01 |
| Follow up year                             | 4.8 ± 4.0                      | 5.1 ± 3.9                    | -0.06 | 4.9 ± 4.0                      | 4.8 ± 3.9                    | 0.01  |
| In-hospital outcome                        |                                |                              |       |                                |                              |       |
| In-hospital mortality                      | 1,706 (8.5)                    | 3,231 (7.0)                  | 0.06  | 1,587 (8.5)                    | 1,419 (7.6)                  | 0.03  |
| New onset stroke                           | 638 (3.2)                      | 1,360 (2.9)                  | 0.01  | 590 (3.2)                      | 618 (3.3)                    | -0.01 |

| Variable              | Before matching        |                      |       | After matching         |                      |       |
|-----------------------|------------------------|----------------------|-------|------------------------|----------------------|-------|
|                       | Female<br>(n = 20,078) | Male<br>(n = 46,248) | STD   | Female<br>(n = 18,720) | Male<br>(n = 18,720) | STD   |
| New onset dialysis    | 1,744 (8.7)            | 3,396 (7.3)          | 0.05  | 1,613 (8.6)            | 1,575 (8.4)          | 0.01  |
| Late outcome          |                        |                      |       |                        |                      |       |
| All-cause mortality   | 7,779 (38.7)           | 17,073 (36.9)        | 0.04  | 7,278 (38.9)           | 7,511 (40.1)         | -0.03 |
| MACE*                 | 5,617 (28.0)           | 13,542 (29.3)        | -0.03 | 5,329 (28.5)           | 5,413 (28.9)         | -0.01 |
| All-cause readmission | 12,870 (64.1)          | 29,729 (64.3)        | <0.01 | 12,055 (64.4)          | 12,064 (64.4)        | <0.01 |

STD, standardized difference; CABG, coronary artery bypass graft; MACE, major adverse cardiovascular events;

Values are given as number (%) or mean  $\pm$  standard deviation;

\* Including anyone of cardiovascular death, revascularization, acute myocardial infraction or ischemic stroke.

**Table S4.** Demographics, clinical and surgical characteristics, and outcomes of women and men who underwent CABG surgery alone.

| Variable                              | Before matching               |                              |       | After matching                |                             |       |
|---------------------------------------|-------------------------------|------------------------------|-------|-------------------------------|-----------------------------|-------|
|                                       | Female<br>( <i>n</i> = 9,849) | Male<br>( <i>n</i> = 32,303) | STD   | Female<br>( <i>n</i> = 9,818) | Male<br>( <i>n</i> = 9,818) | STD   |
| Age (years)                           | 67.6 ± 9.6                    | 64.6 ± 10.8                  | 0.29  | 67.6 ± 9.5                    | 67.5 ± 9.9                  | 0.01  |
| Monthly income, US dollar             |                               |                              |       |                               |                             |       |
| 0–596                                 | 4,018 (40.8)                  | 13,544 (41.9)                | -0.02 | 4,013 (40.9)                  | 4,110 (41.9)                | -0.02 |
| 610–760                               | 3,574 (36.3)                  | 8,674 (26.9)                 | 0.20  | 3,548 (36.1)                  | 3,428 (34.9)                | 0.03  |
| > 800                                 | 2,257 (22.9)                  | 10,085 (31.2)                | -0.19 | 2,257 (23.0)                  | 2,280 (23.2)                | -0.01 |
| Urbanization level                    |                               |                              |       |                               |                             |       |
| Low                                   | 1,523 (15.5)                  | 3,969 (12.3)                 | 0.09  | 1,507 (15.3)                  | 1,421 (14.5)                | 0.02  |
| Moderate                              | 2,782 (28.2)                  | 8,498 (26.3)                 | 0.04  | 2,770 (28.2)                  | 2,736 (27.9)                | 0.01  |
| High                                  | 3,065 (31.1)                  | 10,347 (32.0)                | -0.02 | 3,062 (31.2)                  | 3,166 (32.2)                | -0.02 |
| Very High                             | 2,479 (25.2)                  | 9,489 (29.4)                 | -0.09 | 2,479 (25.2)                  | 2,495 (25.4)                | <0.01 |
| Previous cardiac surgery              | 43 (0.4)                      | 195 (0.6)                    | -0.02 | 43 (0.4)                      | 36 (0.4)                    | 0.01  |
| Urgent surgery                        | 1,453 (14.8)                  | 4,628 (14.3)                 | 0.01  | 1,447 (14.7)                  | 1,446 (14.7)                | <0.01 |
| Comorbid conditions                   |                               |                              |       |                               |                             |       |
| Diabetes mellitus                     | 6,470 (65.7)                  | 15,077 (46.7)                | 0.39  | 6,439 (65.6)                  | 6,461 (65.8)                | <0.01 |
| Hypertension                          | 7,777 (79.0)                  | 22,613 (70.0)                | 0.21  | 7,746 (78.9)                  | 7,763 (79.1)                | <0.01 |
| Heart failure                         | 2,193 (22.3)                  | 5,144 (15.9)                 | 0.16  | 2,170 (22.1)                  | 2,146 (21.9)                | 0.01  |
| Coronary arterial disease             | 9,820 (99.7)                  | 32,242 (99.8)                | -0.02 | 9,791 (99.7)                  | 9,788 (99.7)                | 0.01  |
| Prior myocardial infarction           | 2,219 (22.5)                  | 8,344 (25.8)                 | -0.08 | 2,217 (22.6)                  | 2,201 (22.4)                | <0.01 |
| Peripheral arterial disease           | 666 (6.8)                     | 1,787 (5.5)                  | 0.05  | 664 (6.8)                     | 674 (6.9)                   | <0.01 |
| Prior stroke                          | 1,769 (18.0)                  | 4,765 (14.8)                 | 0.09  | 1,763 (18.0)                  | 1,769 (18.0)                | <0.01 |
| Chronic obstructive pulmonary disease | 494 (5.0)                     | 2,990 (9.3)                  | -0.17 | 494 (5.0)                     | 521 (5.3)                   | -0.01 |

| Variable                                                         | Before matching       |                      |       | After matching        |                     |       |
|------------------------------------------------------------------|-----------------------|----------------------|-------|-----------------------|---------------------|-------|
|                                                                  | Female<br>(n = 9,849) | Male<br>(n = 32,303) | STD   | Female<br>(n = 9,818) | Male<br>(n = 9,818) | STD   |
| Liver cirrhosis                                                  | 90 (0.9)              | 412 (1.3)            | -0.03 | 90 (0.9)              | 112 (1.1)           | -0.02 |
| Malignancy                                                       | 364 (3.7)             | 1,046 (3.2)          | 0.03  | 364 (3.7)             | 353 (3.6)           | 0.01  |
| Charlson's Comorbidity Index score                               | 3.1 ± 2.5             | 2.5 ± 2.2            | 0.25  | 3.1 ± 2.5             | 3.1 ± 2.5           | -0.01 |
| Hospital level                                                   |                       |                      |       |                       |                     |       |
| Medical center (teaching hospital)                               | 6,809 (69.1)          | 23,011 (71.2)        | -0.05 | 6,794 (69.2)          | 6,841 (69.7)        | -0.01 |
| Regional / district hospital                                     | 3,040 (30.9)          | 9,292 (28.8)         | 0.05  | 3,024 (30.8)          | 2,977 (30.3)        | 0.01  |
| Cumulative volume of valve or CABG surgery between 2000 and 2013 |                       |                      |       |                       |                     |       |
| 1st quartile (1-1289)                                            | 2,873 (29.2)          | 8,217 (25.4)         | 0.08  | 2,854 (29.1)          | 2,776 (28.3)        | 0.02  |
| 2nd quartile (1675-3462)                                         | 2,973 (30.2)          | 9,436 (29.2)         | 0.02  | 2,967 (30.2)          | 2,972 (30.3)        | <0.01 |
| 3rd quartile (4453-5162)                                         | 1,803 (18.3)          | 7,244 (22.4)         | -0.10 | 1,801 (18.3)          | 1,817 (18.5)        | <0.01 |
| 4th quartile (6158-8056)                                         | 2,200 (22.3)          | 7,406 (22.9)         | -0.01 | 2,196 (22.4)          | 2,253 (22.9)        | -0.01 |
| CABG details                                                     |                       |                      |       |                       |                     |       |
| Number of bypassed vessels                                       |                       |                      |       |                       |                     |       |
| 1                                                                | 453 (4.6)             | 980 (3.0)            | 0.08  | 451 (4.6)             | 287 (2.9)           | 0.09  |
| 2                                                                | 1,775 (18.0)          | 5,016 (15.5)         | 0.07  | 1,767 (18.0)          | 1,520 (15.5)        | 0.07  |
| 3                                                                | 6,173 (62.7)          | 21,200 (65.6)        | -0.06 | 6,157 (62.7)          | 6,418 (65.4)        | -0.06 |
| 4 or more                                                        | 1,448 (14.7)          | 5,107 (15.8)         | -0.03 | 1,443 (14.7)          | 1,593 (16.2)        | -0.04 |
| Number of bypassed vessels                                       | 2.87 ± 0.70           | 2.94 ± 0.66          | -0.10 | 2.88 ± 0.70           | 2.95 ± 0.66         | -0.11 |
| Type of CABG                                                     |                       |                      |       |                       |                     |       |
| On pump                                                          | 7,841 (79.6)          | 25,781 (79.8)        | <0.01 | 7,817 (79.6)          | 7,817 (79.6)        | <0.01 |
| Off pump                                                         | 2,008 (20.4)          | 6,522 (20.2)         | <0.01 | 2,001 (20.4)          | 2,001 (20.4)        | <0.01 |



| Variable              | Before matching       |                      |       | After matching        |                     |       |
|-----------------------|-----------------------|----------------------|-------|-----------------------|---------------------|-------|
|                       | Female<br>(n = 9,849) | Male<br>(n = 32,303) | STD   | Female<br>(n = 9,818) | Male<br>(n = 9,818) | STD   |
| Concomitant maze      | 43 (0.4)              | 133 (0.4)            | <0.01 | 42 (0.4)              | 41 (0.4)            | <0.01 |
| Follow up year        | 4.9 ± 3.9             | 5.2 ± 3.9            | -0.08 | 4.9 ± 3.9             | 4.9 ± 3.9           | <0.01 |
| In-hospital outcome   |                       |                      |       |                       |                     |       |
| In-hospital mortality | 862 (8.8)             | 2,111 (6.5)          | 0.08  | 853 (8.7)             | 770 (7.8)           | 0.03  |
| New onset stroke      | 332 (3.4)             | 872 (2.7)            | 0.04  | 330 (3.4)             | 297 (3.0)           | 0.02  |
| New onset dialysis    | 974 (9.9)             | 2,383 (7.4)          | 0.09  | 966 (9.8)             | 967 (9.8)           | <0.01 |
| Late outcome          |                       |                      |       |                       |                     |       |
| All-cause mortality   | 4,408 (44.8)          | 12,109 (37.5)        | 0.15  | 4,380 (44.6)          | 4,453 (45.4)        | -0.01 |
| MACE*                 | 3,569 (36.2)          | 10,438 (32.3)        | 0.08  | 3,559 (36.2)          | 3,446 (35.1)        | 0.02  |
| All-cause readmission | 6,923 (70.3)          | 21,540 (66.7)        | 0.08  | 6,907 (70.4)          | 6,823 (69.5)        | 0.02  |

STD, standardized difference; CABG, coronary artery bypass graft; MACE, major adverse cardiovascular events;

Values are given as number (%) or mean ± standard deviation;

\* Including anyone of cardiovascular death, revascularization, acute myocardial infraction or ischemic stroke.

**Table S5.** Demographics, clinical and surgical characteristics, and outcomes of women and men who underwent valve surgery alone.

| Variable                              | Before matching               |                              |       | After matching                |                             |       |
|---------------------------------------|-------------------------------|------------------------------|-------|-------------------------------|-----------------------------|-------|
|                                       | Female<br>( <i>n</i> = 8,573) | Male<br>( <i>n</i> = 10,487) | STD   | Female<br>( <i>n</i> = 7,374) | Male<br>( <i>n</i> = 7,374) | STD   |
| Age (years)                           | 59.8 ± 14.7                   | 58.1 ± 15.1                  | 0.12  | 59.3 ± 15.0                   | 58.6 ± 14.6                 | 0.04  |
| Monthly income, US dollar             |                               |                              |       |                               |                             |       |
| 0–596                                 | 2,964 (34.6)                  | 3,739 (35.7)                 | -0.02 | 2,597 (35.2)                  | 2,532 (34.3)                | 0.02  |
| 610–760                               | 3,128 (36.5)                  | 3,379 (32.2)                 | 0.09  | 2,558 (34.7)                  | 2,581 (35.0)                | -0.01 |
| > 800                                 | 2,481 (28.9)                  | 3,369 (32.1)                 | -0.07 | 2,219 (30.1)                  | 2,261 (30.7)                | -0.01 |
| Urbanization level                    |                               |                              |       |                               |                             |       |
| Low                                   | 1,357 (15.8)                  | 1,611 (15.4)                 | 0.01  | 1,131 (15.3)                  | 1,169 (15.9)                | -0.01 |
| Moderate                              | 2,399 (28.0)                  | 3,184 (30.4)                 | -0.05 | 2,125 (28.8)                  | 2,070 (28.1)                | 0.02  |
| High                                  | 2,616 (30.5)                  | 3,211 (30.6)                 | <0.01 | 2,259 (30.6)                  | 2,313 (31.4)                | -0.02 |
| Very High                             | 2,201 (25.7)                  | 2,481 (23.7)                 | 0.05  | 1,859 (25.2)                  | 1,822 (24.7)                | 0.01  |
| Previous cardiac surgery              | 231 (2.7)                     | 272 (2.6)                    | 0.01  | 193 (2.6)                     | 222 (3.0)                   | -0.02 |
| Urgent surgery                        | 430 (5.0)                     | 668 (6.4)                    | -0.06 | 397 (5.4)                     | 402 (5.5)                   | <0.01 |
| Comorbid conditions                   |                               |                              |       |                               |                             |       |
| Diabetes mellitus                     | 1,526 (17.8)                  | 1,655 (15.8)                 | 0.05  | 1,272 (17.2)                  | 1,206 (16.4)                | 0.02  |
| Hypertension                          | 3,203 (37.4)                  | 4,177 (39.8)                 | -0.05 | 2,848 (38.6)                  | 2,713 (36.8)                | 0.04  |
| Heart failure                         | 3,191 (37.2)                  | 3,791 (36.1)                 | 0.02  | 2,613 (35.4)                  | 2,713 (36.8)                | -0.03 |
| Coronary arterial disease             | 2,276 (26.5)                  | 3,002 (28.6)                 | -0.05 | 1,993 (27.0)                  | 1,921 (26.1)                | 0.02  |
| Prior myocardial infarction           | 247 (2.9)                     | 414 (3.9)                    | -0.06 | 231 (3.1)                     | 213 (2.9)                   | 0.01  |
| Peripheral arterial disease           | 208 (2.4)                     | 236 (2.3)                    | 0.01  | 160 (2.2)                     | 171 (2.3)                   | -0.01 |
| Prior stroke                          | 865 (10.1)                    | 982 (9.4)                    | 0.02  | 698 (9.5)                     | 711 (9.6)                   | -0.01 |
| Chronic obstructive pulmonary disease | 479 (5.6)                     | 1,175 (11.2)                 | -0.20 | 457 (6.2)                     | 458 (6.2)                   | <0.01 |

| Variable                                                         | Before matching       |                      |       | After matching        |                     |       |
|------------------------------------------------------------------|-----------------------|----------------------|-------|-----------------------|---------------------|-------|
|                                                                  | Female<br>(n = 8,573) | Male<br>(n = 10,487) | STD   | Female<br>(n = 7,374) | Male<br>(n = 7,374) | STD   |
| Liver cirrhosis                                                  | 182 (2.1)             | 419 (4.0)            | -0.11 | 161 (2.2)             | 178 (2.4)           | -0.02 |
| Malignancy                                                       | 355 (4.1)             | 354 (3.4)            | 0.04  | 286 (3.9)             | 257 (3.5)           | 0.02  |
| Charlson's Comorbidity Index score                               | 1.9 ± 1.9             | 1.9 ± 1.9            | <0.01 | 1.8 ± 1.9             | 1.8 ± 1.8           | <0.01 |
| Hospital level                                                   |                       |                      |       |                       |                     |       |
| Medical center (teaching hospital)                               | 6,398 (74.6)          | 7,992 (76.2)         | -0.04 | 5,568 (75.5)          | 5,547 (75.2)        | 0.01  |
| Regional / district hospital                                     | 2,175 (25.4)          | 2,495 (23.8)         | 0.04  | 1,806 (24.5)          | 1,827 (24.8)        | -0.01 |
| Cumulative volume of valve or CABG surgery between 2000 and 2013 |                       |                      |       |                       |                     |       |
| 1st quartile (1-1289)                                            | 1,846 (21.5)          | 2,297 (21.9)         | -0.01 | 1,556 (21.1)          | 1,622 (22.0)        | -0.02 |
| 2nd quartile (1675-3462)                                         | 2,085 (24.3)          | 2,496 (23.8)         | 0.01  | 1,756 (23.8)          | 1,843 (25.0)        | -0.03 |
| 3rd quartile (4453-5162)                                         | 2,012 (23.5)          | 2,807 (26.8)         | -0.08 | 1,824 (24.7)          | 1,823 (24.7)        | <0.01 |
| 4th quartile (6158-8056)                                         | 2,630 (30.7)          | 2,887 (27.5)         | 0.07  | 2,238 (30.3)          | 2,086 (28.3)        | 0.05  |
| Valve surgery details                                            |                       |                      |       |                       |                     |       |
| Number of involved valves                                        |                       |                      |       |                       |                     |       |
| 1                                                                | 4,638 (54.1)          | 6,432 (61.3)         | -0.15 | 4,279 (58.0)          | 4,279 (58.0)        | <0.01 |
| 2                                                                | 3,294 (38.4)          | 3,371 (32.1)         | 0.13  | 2,600 (35.3)          | 2,600 (35.3)        | <0.01 |
| 3                                                                | 641 (7.5)             | 684 (6.5)            | 0.04  | 495 (6.7)             | 495 (6.7)           | <0.01 |
| Number of intervened valves                                      | 1.53 ± 0.63           | 1.45 ± 0.61          | 0.13  | 1.49 ± 0.62           | 1.49 ± 0.62         | <0.01 |
| Type of valve surgery                                            |                       |                      |       |                       |                     |       |
| Aortic valve repair or replacement                               | 3,309 (38.6)          | 5,247 (50.0)         | -0.23 | 3,157 (42.8)          | 3,157 (42.8)        | <0.01 |
| Mitral valve repair                                              | 2,744 (32.0)          | 3,008 (28.7)         | 0.07  | 2,235 (30.3)          | 2,235 (30.3)        | <0.01 |
| Mitral valve replacement                                         | 4,963 (57.9)          | 4,616 (44.0)         | 0.28  | 3,904 (52.9)          | 3,904 (52.9)        | <0.01 |

| Variable              | Before matching               |                              |       | After matching                |                             |       |
|-----------------------|-------------------------------|------------------------------|-------|-------------------------------|-----------------------------|-------|
|                       | Female<br>( <i>n</i> = 8,573) | Male<br>( <i>n</i> = 10,487) | STD   | Female<br>( <i>n</i> = 7,374) | Male<br>( <i>n</i> = 7,374) | STD   |
| Tricuspid repair      | 1,215 (14.2)                  | 1,107 (10.6)                 | 0.11  | 900 (12.2)                    | 900 (12.2)                  | <0.01 |
| Tricuspid replacement | 318 (3.7)                     | 368 (3.5)                    | 0.01  | 224 (3.0)                     | 224 (3.0)                   | <0.01 |
| Concomitant maze      | 1,231 (14.4)                  | 1,073 (10.2)                 | 0.13  | 858 (11.6)                    | 925 (12.5)                  | -0.03 |
| Follow up year        | 5.0 ± 4.0                     | 5.0 ± 4.0                    | 0.01  | 5.1 ± 4.0                     | 5.0 ± 4.0                   | 0.02  |
| In-hospital outcome   |                               |                              |       |                               |                             |       |
| In-hospital mortality | 582 (6.8)                     | 649 (6.2)                    | 0.02  | 500 (6.8)                     | 422 (5.7)                   | 0.04  |
| New onset stroke      | 241 (2.8)                     | 352 (3.4)                    | -0.03 | 203 (2.8)                     | 254 (3.4)                   | -0.04 |
| New onset dialysis    | 506 (5.9)                     | 599 (5.7)                    | 0.01  | 419 (5.7)                     | 421 (5.7)                   | <0.01 |
| Late outcome          |                               |                              |       |                               |                             |       |
| All-cause mortality   | 2,502 (29.2)                  | 3,317 (31.6)                 | -0.05 | 2,112 (28.6)                  | 2,299 (31.2)                | -0.06 |
| MACE*                 | 1,603 (18.7)                  | 2,114 (20.2)                 | -0.04 | 1,364 (18.5)                  | 1,527 (20.7)                | -0.06 |
| All-cause readmission | 4,945 (57.7)                  | 6,079 (58.0)                 | -0.01 | 4,220 (57.2)                  | 4,302 (58.3)                | -0.02 |

STD, standardized difference; CABG, coronary artery bypass graft; MACE, major adverse cardiovascular events;

Values are given as number (%) or mean ± standard deviation;

\* Including anyone of cardiovascular death, revascularization, acute myocardial infraction or ischemic stroke.

**Table S6.** Demographics, clinical and surgical characteristics, and outcomes of women and men who underwent CABG and valve surgery simultaneously.

| Variable                    | Before matching               |                             |       | After matching                |                             |       |
|-----------------------------|-------------------------------|-----------------------------|-------|-------------------------------|-----------------------------|-------|
|                             | Female<br>( <i>n</i> = 1,656) | Male<br>( <i>n</i> = 3,458) | STD   | Female<br>( <i>n</i> = 1,528) | Male<br>( <i>n</i> = 1,528) | STD   |
| Age (years)                 | 68.7 ± 11.0                   | 66.3 ± 11.9                 | 0.21  | 68.6 ± 10.9                   | 68.1 ± 10.6                 | 0.04  |
| Monthly income, US dollar   |                               |                             |       |                               |                             |       |
| 0–596                       | 638 (38.5)                    | 1,436 (41.5)                | -0.06 | 608 (39.8)                    | 591 (38.7)                  | 0.02  |
| 610–760                     | 637 (38.5)                    | 1,087 (31.4)                | 0.15  | 565 (37.0)                    | 583 (38.2)                  | -0.02 |
| > 800                       | 381 (23.0)                    | 935 (27.0)                  | -0.09 | 355 (23.2)                    | 354 (23.2)                  | <0.01 |
| Urbanization level          |                               |                             |       |                               |                             |       |
| Low                         | 268 (16.2)                    | 413 (11.9)                  | 0.12  | 227 (14.9)                    | 242 (15.8)                  | -0.03 |
| Moderate                    | 471 (28.4)                    | 971 (28.1)                  | 0.01  | 438 (28.7)                    | 437 (28.6)                  | <0.01 |
| High                        | 475 (28.7)                    | 1,062 (30.7)                | -0.04 | 451 (29.5)                    | 442 (28.9)                  | 0.01  |
| Very High                   | 442 (26.7)                    | 1,012 (29.3)                | -0.06 | 412 (27.0)                    | 407 (26.6)                  | 0.01  |
| Previous cardiac surgery    | 16 (1.0)                      | 48 (1.4)                    | -0.04 | 15 (1.0)                      | 13 (0.9)                    | 0.01  |
| Urgent surgery              | 163 (9.8)                     | 405 (11.7)                  | -0.06 | 150 (9.8)                     | 147 (9.6)                   | 0.01  |
| Comorbid conditions         |                               |                             |       |                               |                             |       |
| Diabetes mellitus           | 765 (46.2)                    | 1,155 (33.4)                | 0.26  | 678 (44.4)                    | 684 (44.8)                  | -0.01 |
| Hypertension                | 1,122 (67.8)                  | 2,093 (60.5)                | 0.15  | 1,025 (67.1)                  | 1,025 (67.1)                | <0.01 |
| Heart failure               | 687 (41.5)                    | 1,291 (37.3)                | 0.09  | 607 (39.7)                    | 596 (39.0)                  | 0.01  |
| Coronary arterial disease   | 1,536 (92.8)                  | 3,194 (92.4)                | 0.01  | 1,416 (92.7)                  | 1,419 (92.9)                | -0.01 |
| Prior myocardial infarction | 266 (16.1)                    | 689 (19.9)                  | -0.10 | 251 (16.4)                    | 242 (15.8)                  | 0.02  |
| Peripheral arterial disease | 107 (6.5)                     | 181 (5.2)                   | 0.05  | 95 (6.2)                      | 87 (5.7)                    | 0.02  |
| Prior stroke                | 260 (15.7)                    | 480 (13.9)                  | 0.05  | 232 (15.2)                    | 234 (15.3)                  | <0.01 |

| Variable                                                         | Before matching       |                     |       | After matching        |                     |       |
|------------------------------------------------------------------|-----------------------|---------------------|-------|-----------------------|---------------------|-------|
|                                                                  | Female<br>(n = 1,656) | Male<br>(n = 3,458) | STD   | Female<br>(n = 1,528) | Male<br>(n = 1,528) | STD   |
| Chronic obstructive pulmonary disease                            | 123 (7.4)             | 449 (13.0)          | -0.18 | 117 (7.7)             | 123 (8.0)           | -0.01 |
| Liver cirrhosis                                                  | 25 (1.5)              | 79 (2.3)            | -0.06 | 23 (1.5)              | 17 (1.1)            | 0.03  |
| Malignancy                                                       | 77 (4.6)              | 171 (4.9)           | -0.01 | 72 (4.7)              | 73 (4.8)            | <0.01 |
| Charlson's Comorbidity Index score                               | 3.0 ± 2.4             | 2.7 ± 2.2           | 0.15  | 2.9 ± 2.3             | 2.9 ± 2.3           | -0.02 |
| Hospital level                                                   |                       |                     |       |                       |                     |       |
| Medical center (teaching hospital)                               | 1,126 (68.0)          | 2,479 (71.7)        | -0.08 | 1,043 (68.3)          | 1,044 (68.3)        | <0.01 |
| Regional / district hospital                                     | 530 (32.0)            | 979 (28.3)          | 0.08  | 485 (31.7)            | 484 (31.7)          | <0.01 |
| Cumulative volume of valve or CABG surgery between 2000 and 2013 |                       |                     |       |                       |                     |       |
| 1st quartile (1-1289)                                            | 334 (20.2)            | 555 (16.0)          | 0.11  | 294 (19.2)            | 282 (18.5)          | 0.02  |
| 2nd quartile (1675-3462)                                         | 411 (24.8)            | 908 (26.3)          | -0.03 | 387 (25.3)            | 390 (25.5)          | <0.01 |
| 3rd quartile (4453-5162)                                         | 407 (24.6)            | 987 (28.5)          | -0.09 | 382 (25.0)            | 388 (25.4)          | -0.01 |
| 4th quartile (6158-8056)                                         | 504 (30.4)            | 1,008 (29.1)        | 0.03  | 465 (30.4)            | 468 (30.6)          | <0.01 |
| CABG details                                                     |                       |                     |       |                       |                     |       |
| Number of bypassed vessels                                       |                       |                     |       |                       |                     |       |
| 1                                                                | 546 (33.0)            | 914 (26.4)          | 0.14  | 501 (32.8)            | 396 (25.9)          | 0.15  |
| 2                                                                | 489 (29.5)            | 1,061 (30.7)        | -0.03 | 457 (29.9)            | 467 (30.6)          | -0.01 |
| 3                                                                | 519 (31.3)            | 1,192 (34.5)        | -0.07 | 478 (31.3)            | 527 (34.5)          | -0.07 |
| 4 or more                                                        | 102 (6.2)             | 291 (8.4)           | -0.09 | 92 (6.0)              | 138 (9.0)           | -0.11 |
| Number of bypassed vessels                                       | 2.11 ± 0.94           | 2.25 ± 0.94         | -0.15 | 2.11 ± 0.93           | 2.27 ± 0.95         | -0.17 |
| Type of CABG                                                     |                       |                     |       |                       |                     |       |
| On pump                                                          | 1,627 (98.2)          | 3,400 (98.3)        | -0.01 | 1,516 (99.2)          | 1,516 (99.2)        | <0.01 |

| Variable                           | Before matching       |                     |       | After matching        |                     |       |
|------------------------------------|-----------------------|---------------------|-------|-----------------------|---------------------|-------|
|                                    | Female<br>(n = 1,656) | Male<br>(n = 3,458) | STD   | Female<br>(n = 1,528) | Male<br>(n = 1,528) | STD   |
| Off pump                           | 29 (1.8)              | 58 (1.7)            | 0.01  | 12 (0.8)              | 12 (0.8)            | <0.01 |
| Valve surgery details              |                       |                     |       |                       |                     |       |
| Number of involved valves          |                       |                     |       |                       |                     |       |
| 1                                  | 1,269 (76.6)          | 2,700 (78.1)        | -0.03 | 1,205 (78.9)          | 1,205 (78.9)        | <0.01 |
| 2                                  | 351 (21.2)            | 695 (20.1)          | 0.03  | 305 (20.0)            | 305 (20.0)          | <0.01 |
| 3                                  | 36 (2.2)              | 63 (1.8)            | 0.03  | 18 (1.2)              | 18 (1.2)            | <0.01 |
| Number of intervened valves        | 1.26 ± 0.48           | 1.24 ± 0.47         | 0.04  | 1.22 ± 0.44           | 1.22 ± 0.44         | <0.01 |
| Type of valve surgery              |                       |                     |       |                       |                     |       |
| Aortic valve repair or replacement | 776 (46.9)            | 1,764 (51.0)        | -0.08 | 740 (48.4)            | 740 (48.4)          | <0.01 |
| Mitral valve repair                | 429 (25.9)            | 873 (25.2)          | 0.02  | 377 (24.7)            | 377 (24.7)          | <0.01 |
| Mitral valve replacement           | 671 (40.5)            | 1,241 (35.9)        | 0.10  | 600 (39.3)            | 600 (39.3)          | <0.01 |
| Tricuspid repair                   | 80 (4.8)              | 149 (4.3)           | 0.03  | 53 (3.5)              | 53 (3.5)            | <0.01 |
| Tricuspid replacement              | 12 (0.7)              | 27 (0.8)            | -0.01 | 8 (0.5)               | 8 (0.5)             | <0.01 |
| Concomitant maze                   | 75 (4.5)              | 130 (3.8)           | 0.04  | 69 (4.5)              | 62 (4.1)            | 0.02  |
| Follow up year                     | 3.6 ± 3.7             | 3.8 ± 3.6           | -0.05 | 3.7 ± 3.7             | 3.8 ± 3.7           | -0.02 |
| In-hospital outcome                |                       |                     |       |                       |                     |       |
| In-hospital mortality              | 262 (15.8)            | 471 (13.6)          | 0.06  | 234 (15.3)            | 227 (14.9)          | 0.01  |
| New onset stroke                   | 65 (3.9)              | 136 (3.9)           | 0.00  | 57 (3.7)              | 67 (4.4)            | -0.03 |
| New onset dialysis                 | 264 (15.9)            | 414 (12.0)          | 0.11  | 228 (14.9)            | 187 (12.2)          | 0.08  |
| Late outcome                       |                       |                     |       |                       |                     |       |
| All-cause mortality                | 869 (52.5)            | 1,647 (47.6)        | 0.10  | 786 (51.4)            | 759 (49.7)          | 0.04  |
| MACE*                              | 445 (26.9)            | 990 (28.6)          | -0.04 | 406 (26.6)            | 440 (28.8)          | -0.05 |

| Variable              | Before matching       |                     |       | After matching        |                     |       |
|-----------------------|-----------------------|---------------------|-------|-----------------------|---------------------|-------|
|                       | Female<br>(n = 1,656) | Male<br>(n = 3,458) | STD   | Female<br>(n = 1,528) | Male<br>(n = 1,528) | STD   |
| All-cause readmission | 1,002 (60.5)          | 2,110 (61.0)        | -0.01 | 928 (60.7)            | 939 (61.5)          | -0.01 |

STD, standardized difference; CABG, coronary artery bypass graft; MACE, major adverse cardiovascular events;

Values are given as number (%) or mean  $\pm$  standard deviation;

\* Including anyone of cardiovascular death, revascularization, acute myocardial infraction or ischemic stroke.
